# Supplementary material
Source: publisher figshare collection journal article supplement (https://acs.figshare.com/ndownloader/files/4355659)
Supplement: Supplementary file 1 [file 4355659]

**(±)-*trans, cis*-4-Hydroxy-5,6-di-*O*-isopropylidenecyclohex-2-ene-1-one:**  
**Synthesis and Facile Dimerization to Decahydrodibenzofurans**

Victoria L. Paddock, Robert J. Phipps, Almudena Conde Angulo,  
Araceli Blanco Martin, Carles Giro-Manas, Laetitia J. Martin,  
Andrew J.P. White and Alan C. Spivey

<sup>a</sup>Department of Chemistry, Imperial College, London, SW7 2AY, UK.

**Supporting Information — X-Ray Crystallography**

*Crystal data for 7:* C<sub>9</sub>H<sub>14</sub>Br<sub>2</sub>O<sub>2</sub>, *M* = 314.02, triclinic, *P*−1 (no. 2), *a* = 7.0842(10), *b* = 9.0032(13), *c* = 9.5389(6) Å, *α* = 95.640(8), *β* = 97.798(9), *γ* = 110.869(13)°, *V* = 556.12(13) Å<sup>3</sup>, *Z* = 2, *D*<sub>c</sub> = 1.875 g cm<sup>−3</sup>, μ(Mo-Kα) = 7.256 mm<sup>−1</sup>, *T* = 296 K, colourless blocks, Oxford Diffraction Xcalibur 3 diffractometer; 3660 independent measured reflections (*R*<sub>int</sub> = 0.0261), *F*<sup>2</sup> refinement, *R*<sub>1</sub>(obs) = 0.0315, *wR*<sub>2</sub>(all) = 0.0635, 1964 independent observed absorption-corrected reflections [*|F*<sub>o</sub>| > 4σ(*|F*<sub>o</sub>)], 2θ<sub>max</sub> = 66°, 119 parameters. CCDC 799140.

*Crystal data for 8:* C<sub>18</sub>H<sub>24</sub>O<sub>8</sub>, *M* = 368.37, orthorhombic, *Pca*2<sub>1</sub> (no. 29), *a* = 13.3473(10), *b* = 14.7931(14), *c* = 17.9988(19) Å, *V* = 3553.8(6) Å<sup>3</sup>, *Z* = 8 [two independent molecules], *D*<sub>c</sub> = 1.377 g cm<sup>−3</sup>, μ(Cu-Kα) = 0.915 mm<sup>−1</sup>, *T* = 173 K, colourless prisms, Oxford Diffraction Xcalibur PX Ultra diffractometer; 6380 independent measured reflections (*R*<sub>int</sub> = 0.0385), *F*<sup>2</sup> refinement, *R*<sub>1</sub>(obs) = 0.0478, *wR*<sub>2</sub>(all) = 0.1224, 5848 independent observed absorption-corrected reflections [*|F*<sub>o</sub>| > 4σ(*|F*<sub>o</sub>)], 2θ<sub>max</sub> = 139°, 477 parameters. The absolute structure of **8** could not be unambiguously determined by either *R*-factor tests [*R*<sub>1</sub><sup>+</sup> = 0.0478, *R*<sub>1</sub><sup>−</sup> = 0.0479] or by use of the Flack parameter [*x*<sup>+</sup> = +0.28(13), *x*<sup>−</sup> = +0.72(13)]. CCDC 798850.

Compound **8** crystallised with two independent molecules (A and B) in the asymmetric unit. The two molecules have essentially identical conformations with an r.m.s. fit of all the non-hydrogen atoms of ca. 0.06 Å (see Fig. S6 in the supporting information). The hydroxy proton in each molecule was located from a Δ*F* map and refined freely subject to an O–H distance constraint of 0.90 Å.

## Figures

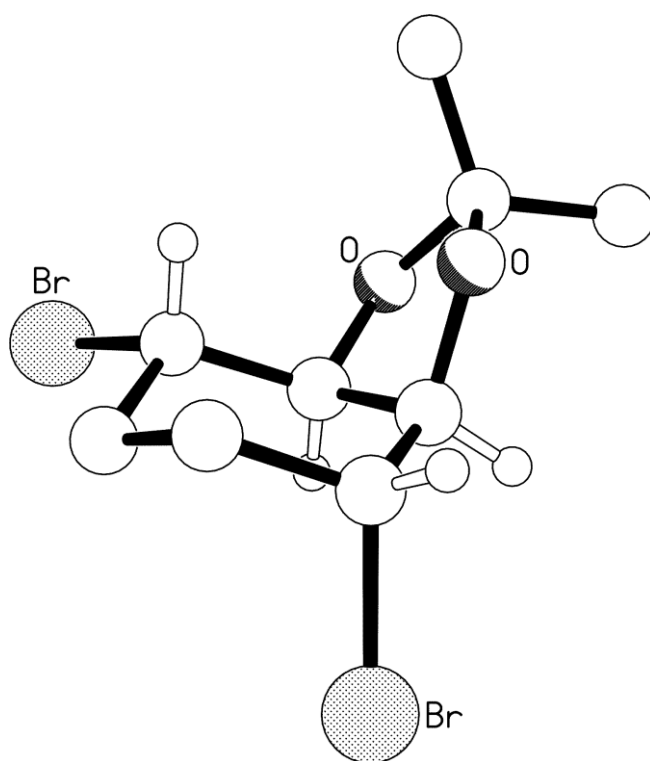

**Fig. S1** The molecular structure of **7**.

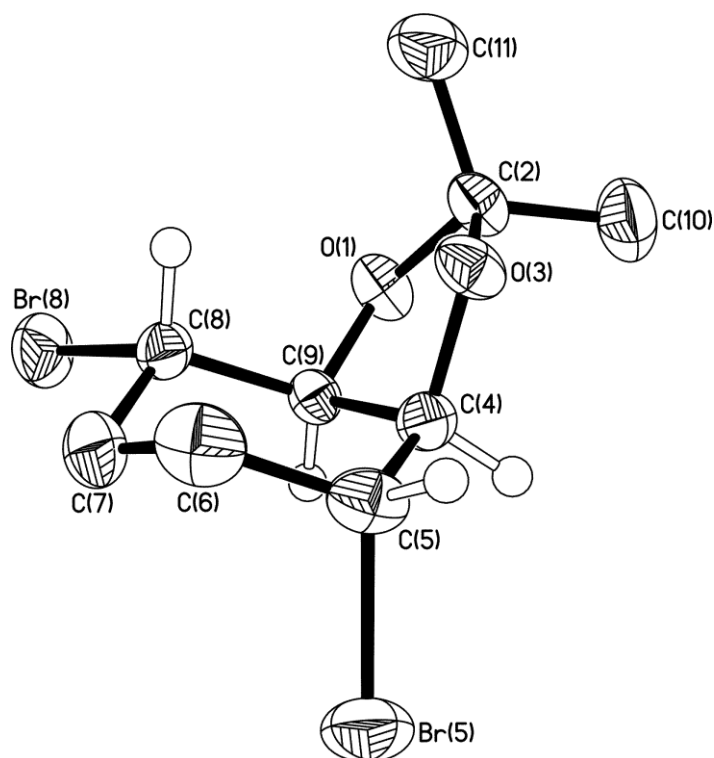

**Fig. S2** The molecular structure of **7** (50% probability ellipsoids).



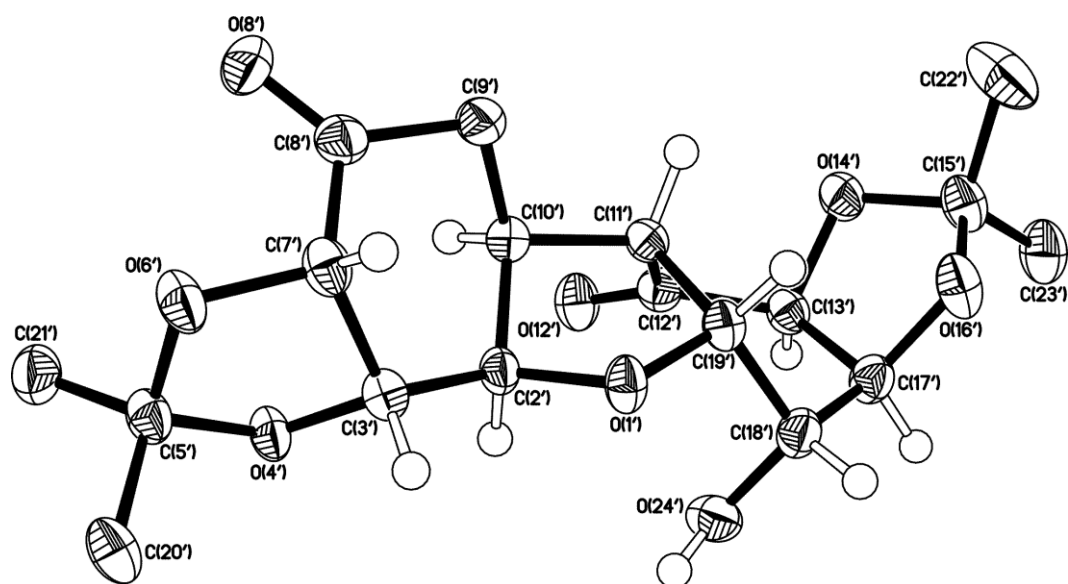

**Fig. S5** The molecular structure of one (**8-B**) of the two crystallographically independent molecules present in the crystals of **8** (50% probability ellipsoids).

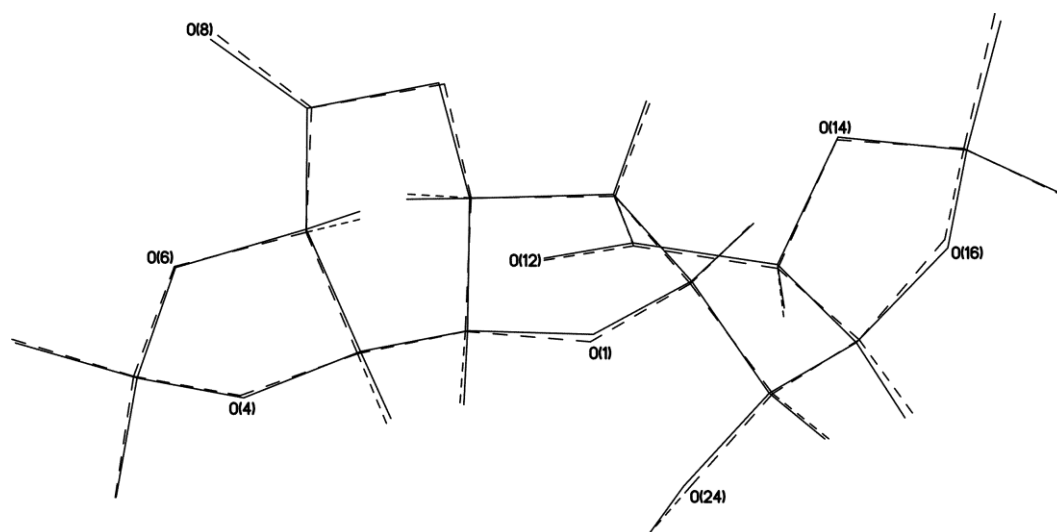

**Fig. S6** Overlay of the two crystallographically independent molecules present in the crystals of **8** (molecule **A** has been drawn with line bonds, and molecule **B** with dashed bonds).
